# Supplementary material
Source: publisher site journal article supplement (https://www.dovepress.com/article/295885)
Supplement: Supplementary file 1 [file get_supplementary_file.php]

**Supplementary materials**

Table S1. The AUC, sensitivity, specificity and positive and negative likelihood ratio of the SPPB and TUG tests.

| **SPPB, points** | **AUC [95% CI]: 0.69 [0.53 – 0.85]** | | | |
| --- | --- | --- | --- | --- |
| Cutoff | Sensitivity %  [95% CI] | Specificity %  95% CI | LR + | LR - |
| ≤ 12 | 100.0  [75.2 – 100.0] | 0.0  [0.0 – 25.7] | 1.00 | 0.0 |
| ≤ 11 | 89.5  [66.9 – 98.7] | 28.0  [24.4 – 65.1] | 1.24 | 0.38 |
| ***≤ 10*** | **78.9**  **[54.4 – 93.9]** | **44.0**  **[24.4 – 65.1]** | **1.41** | **0.48** |
| ≤ 9 | 52.6  [28.9 – 75.6] | 76.0  [54.9 – 90.6] | 2.19 | 0.62 |
| ≤ 8 | 36.8  [16.3 – 61.6] | 88.0  [68.8 – 97.4] | 3.07 | 0.72 |
| ≤ 7 | 21.0  [6.0 – 45.6] | 96.0  [79.6 – 45.6] | 5.26 | 0.82 |
| ≤ 6 | 10.5  [1.3 – 33.1] | 100.0  [86.3 – 100.0] | 0.00 | 0.89 |
| **TUG, seconds** | **AUC [95% CI]: 0.64 [0.47 – 0.88]** | | | |
| ≥ 6 | 100,0  [82.3 – 100.0] | 12,0  [2.5 – 31.2] | 1,10 | 0,00 |
| ≥ 6.5 | 94,7  [74.0 – 99.9] | 12,0  [2.5 – 31.2] | 1,10 | 0,44 |
| ≥ 7.0 | 84,2  [60.4 – 96.6] | 28,0  [12.1 – 49.4] | 1,17 | 0,56 |
| ≥ 7.5 | 84,7  [60.4 – 96.6] | 40,0  [21.1 – 61.3] | 1,41 | 0,40 |
| ≥ 8.0 | 73,7  [48.8 – 90.8] | 48,0  [27.8 – 68.7] | 1,44 | 0,54 |
| ***≥ 8,5*** | **68,4**  **[43.4 – 87.4]** | **64,0**  **[42.5 – 82.0]** | **1,91** | **0,49** |
| ≥ 9.0 | 52,6  [28.9 – 75.6] | 68,0  [46.5 – 85.1] | 1,65 | 0,70 |
| ≥ 9.5 | 42,1  [2.5 – 31.2] | 72,0  [50.6 – 87.9] | 1,50 | 0,80 |
| ≥ 10.0 | 36,8  [16.3 – 61.6] | 80,0  [59.3 – 93.2] | 1,87 | 0,77 |
| ≥ 11.0 | 31,6  [12.6 – 56.5] | 84,0  [63.9 – 95.5] | 1,98 | 0,81 |
| ≥ 12.0 | 21,1  [6.0 – 45.6] | 88,0  [68.8 – 97.4] | 1,75 | 0,90 |
| ≥ 13.0 | 10,5  [1.3 – 33.1] | 92,0  [73.8 – 99.0] | 1,32 | 0,97 |
| ≥ 14.0 | 10,1  [1.3 – 33.1] | 96,0  [73.8 – 99.0] | 2,65 | 0,93 |
| ≥ 15.0 | 7,5  [0.8 – 31.1] | 96,0  [73.8 – 99.0] | 2,12 | 0,95 |
| ≥ 16,0 | 5,4  [0.2 – 26.2] | 96,0  [79.6 – 99.4] | 1,32 | 0,97 |

Note: bold values indicate the best cutoff points for the detection of physical frailty.

Abbreviations: AUC, area under the curve; LR, likelihood ratio; CI, confidence interval; SPPB, short physical performance battery test; TUG, timed-up and go.

Table S2 Eigenvalues distribution

|  | **Eigenvalue** | **Difference** | **Proportion** | **Cumulative** |
| --- | --- | --- | --- | --- |
| **1** | **1.559** | **0.249** | **0.311** | **0.311** |
| **2** | **1.310** | **0.394** | **0.262** | **0.574** |
| 3 | 0.916 | 0.084 | 0.183 | 0.757 |
| 4 | 0.831 | 0.448 | 0.166 | 0.923 |
| 5 | 0.384 |  | 0.077 | 1.000 |

The table reports the Eigenvalues of the correlation matrix relative to the five Fried criteria. The eigenvalues are in descending order, the second column reports the subsequent eigenvalues differences, while third column corresponds to the proportion of variance explained by each eigenvalue. The last column is the cumulative variance explained by the different solutions at increasing number of components. Component 1 and 2 (bold values) are presented in Figure 2.

Table S3 Loading of each Fried criterion in the first two PCA of physical frailty

|  | **Component 1** | **Component 2** |
| --- | --- | --- |
| 4MGS | 0.674 | -0.164 |
| Weakness | -0.063 | 0.759 |
| Exhaustion | 0.411 | 0.276 |
| WEE | -0.518 | -0.358 |
| Weight loss | 0.322 | -0.438 |

Abbreviations: PCA, principal component analysis; 4MGS, 4-meter gait speed; WEE, weakly energy expenditure estimated from the Minnesota Leisure-Time Physical Activity Questionnaire
